# Supplementary material
Source: PubMed Central journal article supplement (PMC5336345)
Supplement: NIHMS851678-supplement-supplement_1.pdf [file NIHMS851678-supplement-supplement_1.pdf]

SUPPLEMENTAL FIGURES 1 to 7

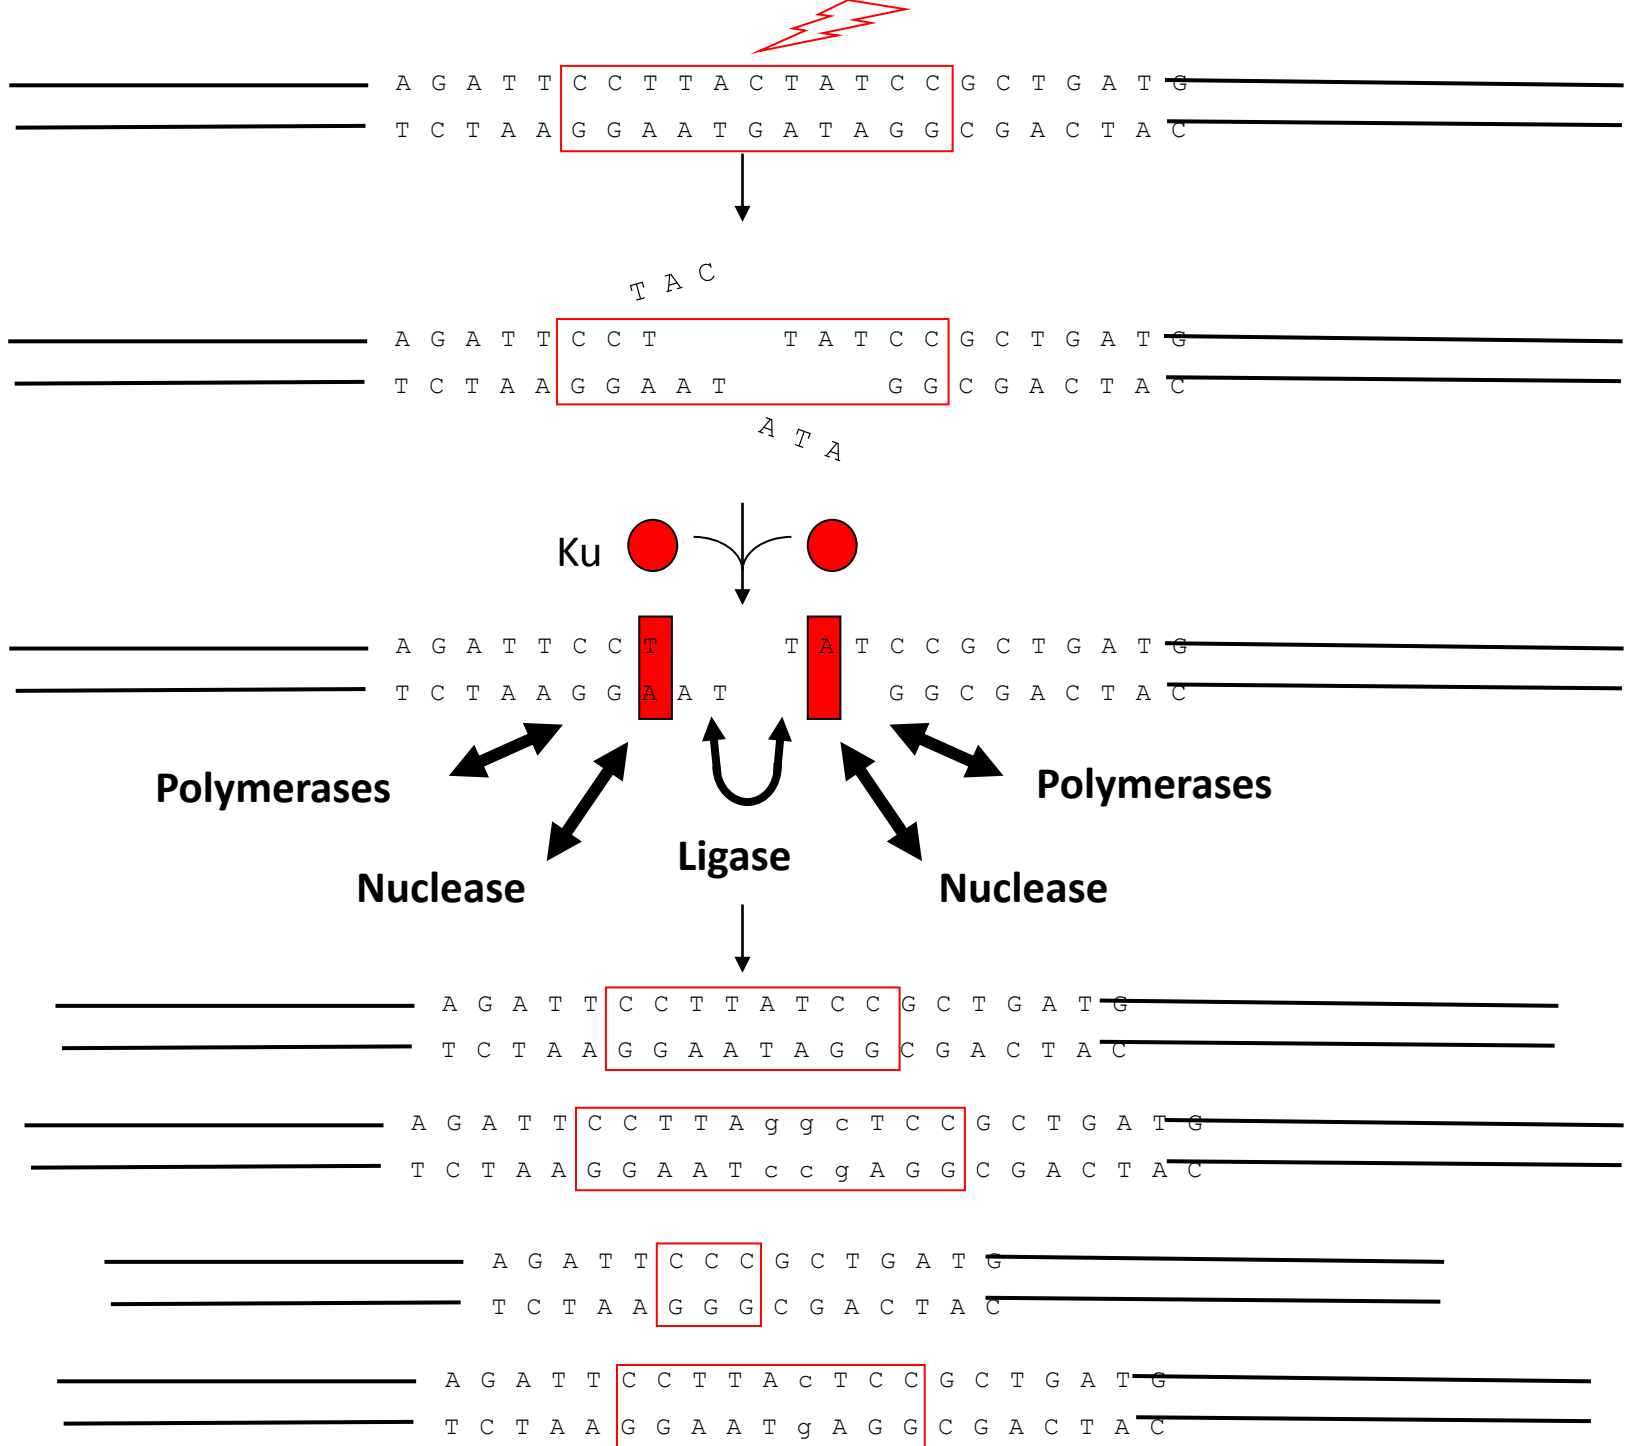

Suppl. Fig. 1

# Balanced translocations provide a window within which initial breakage occurred

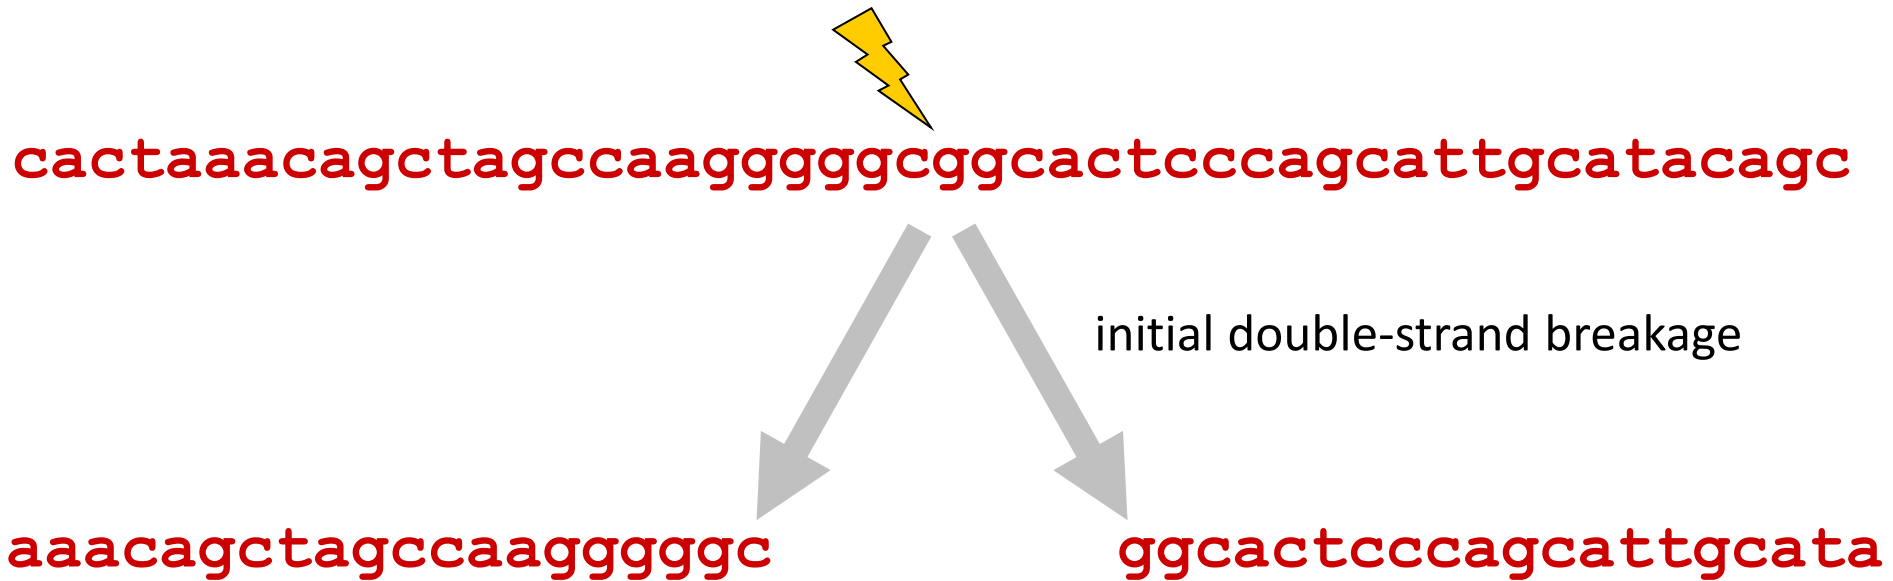

# Balanced translocations provide a window within which initial breakage occurred

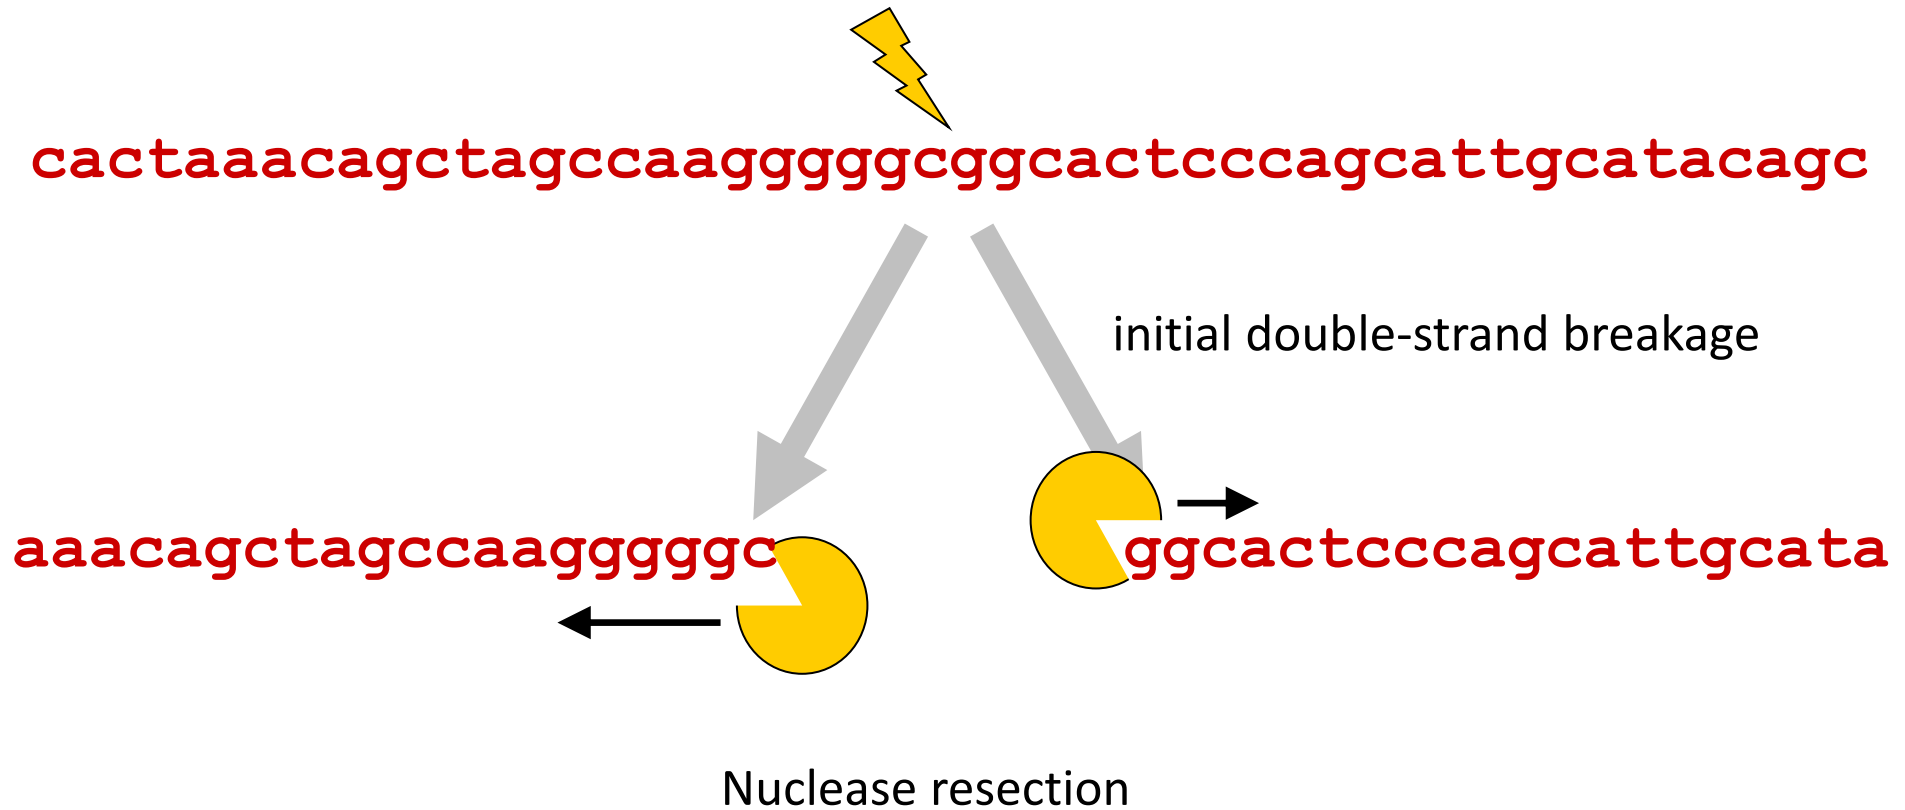

# Balanced translocations provide a window within which initial breakage occurred

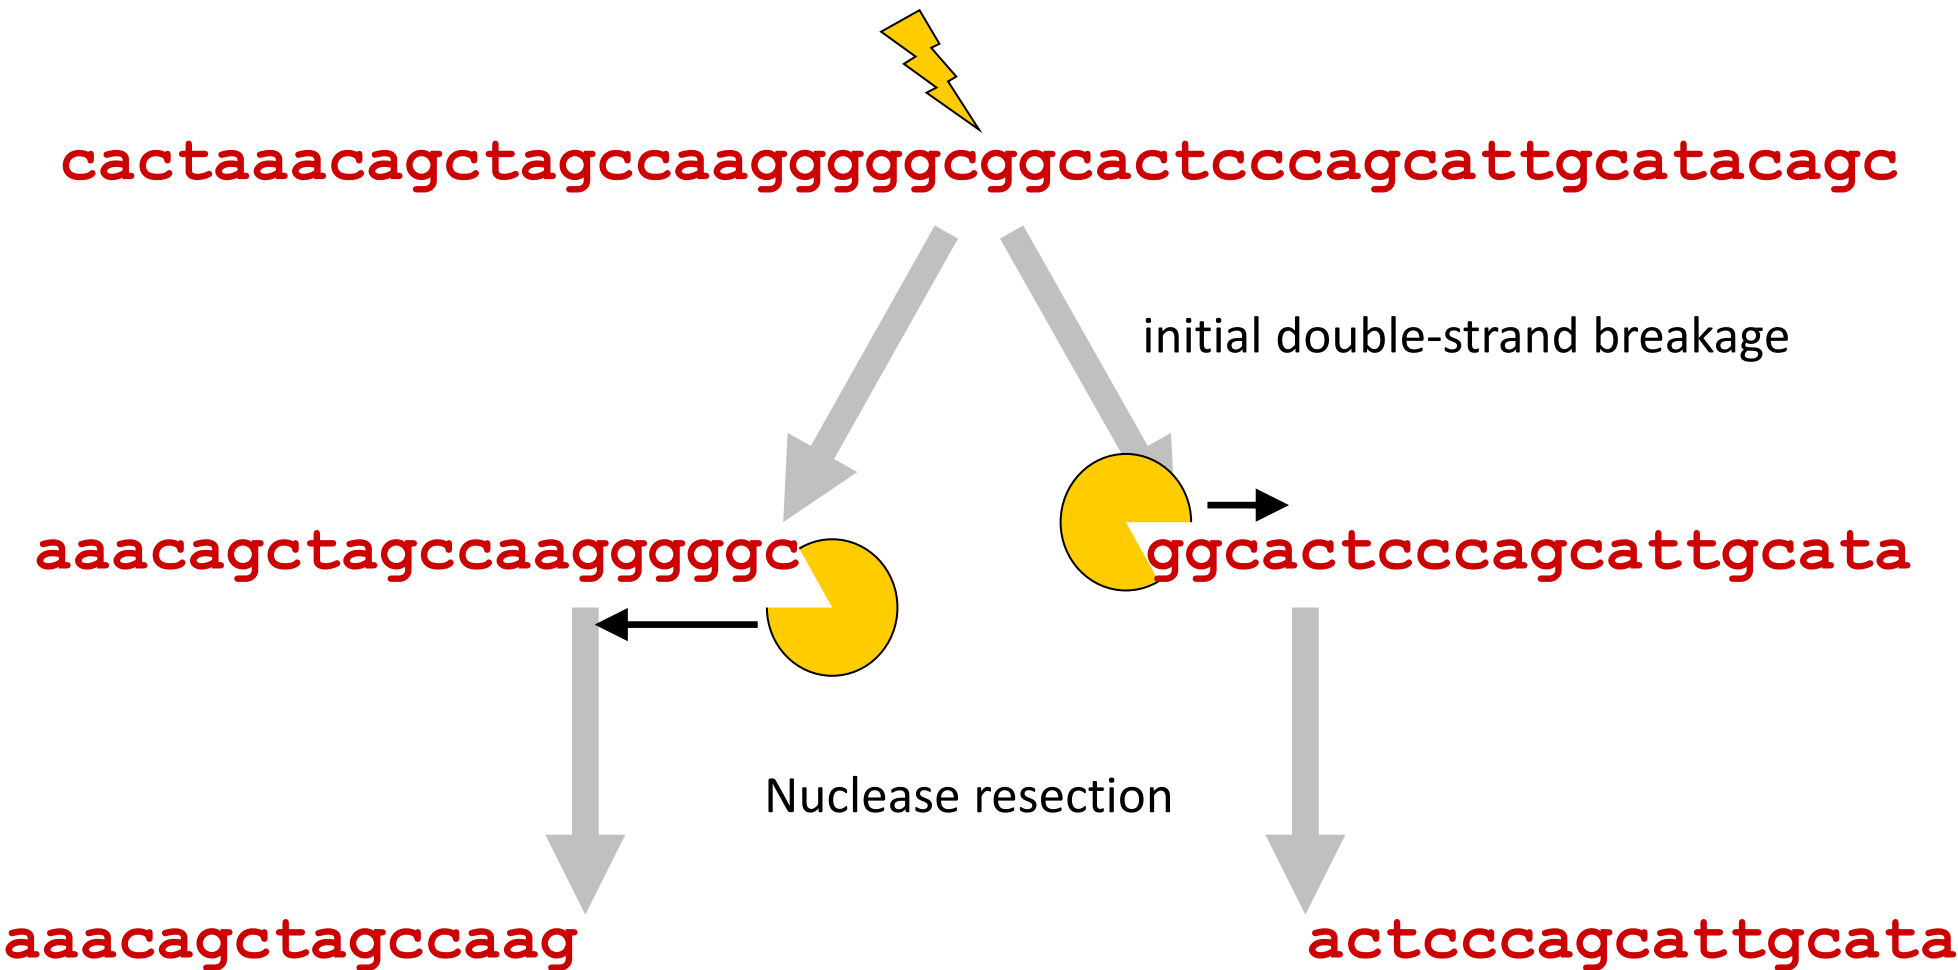

# Balanced translocations provide a window within which initial breakage occurred

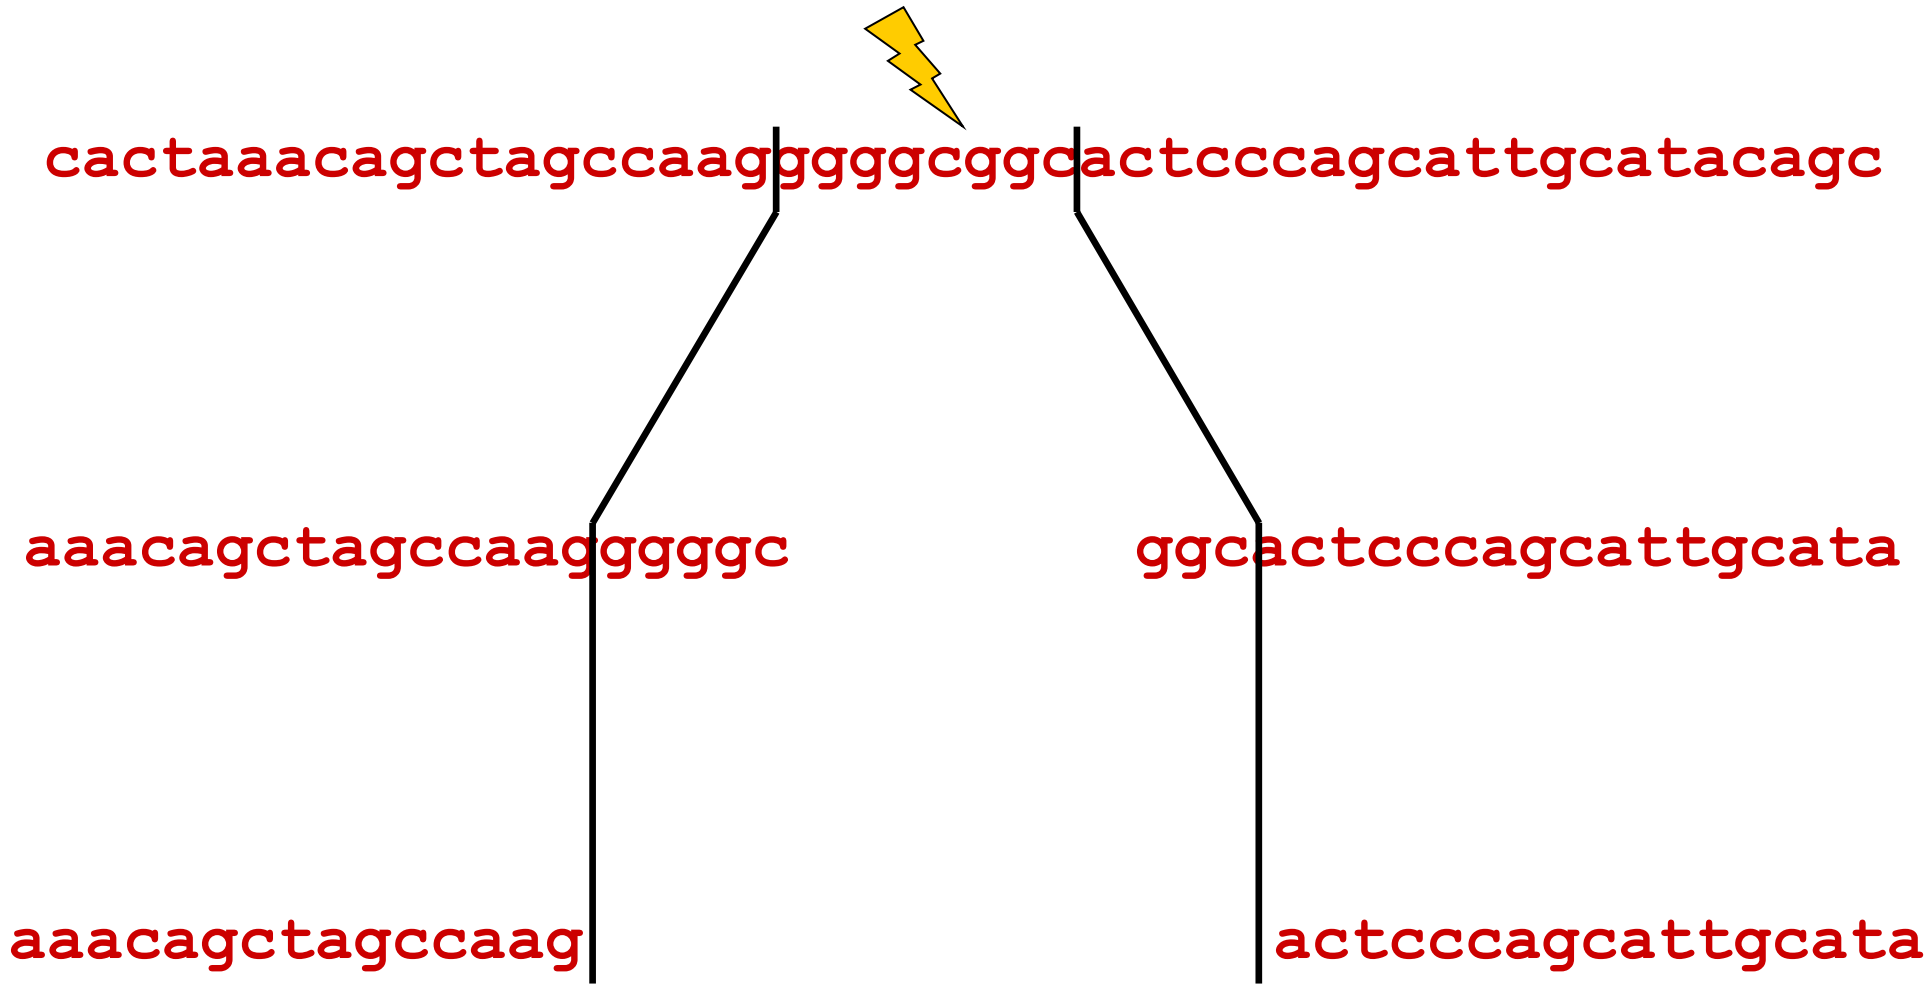

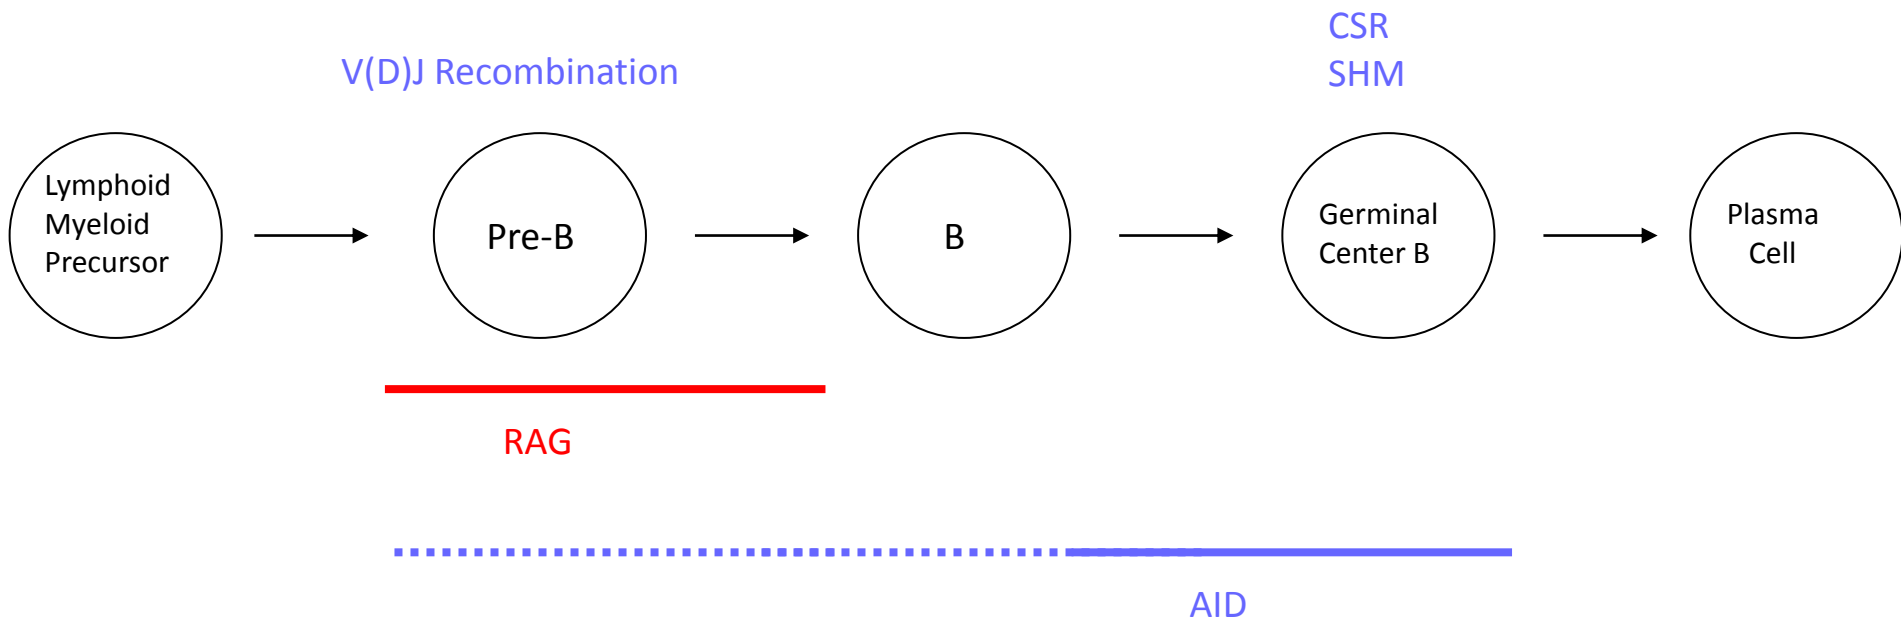

Suppl. Fig. 3

14q32

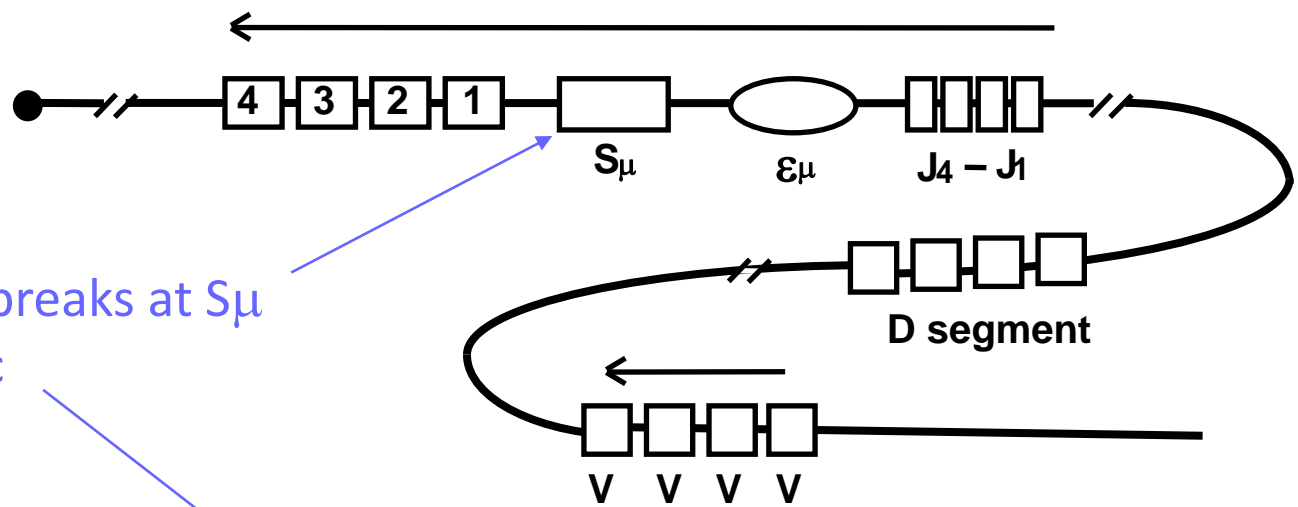

8q24

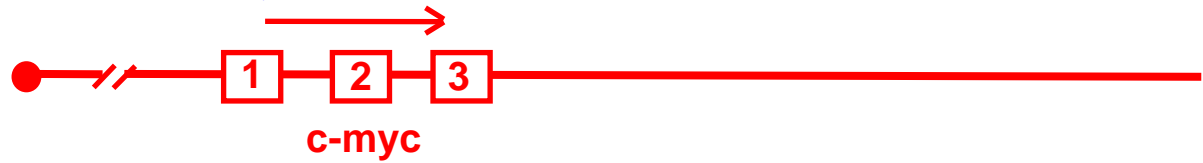

Mechanism of rejoining is by NHEJ, like nearly all translocations

$t(8;14)(q24;q32)$

der 14

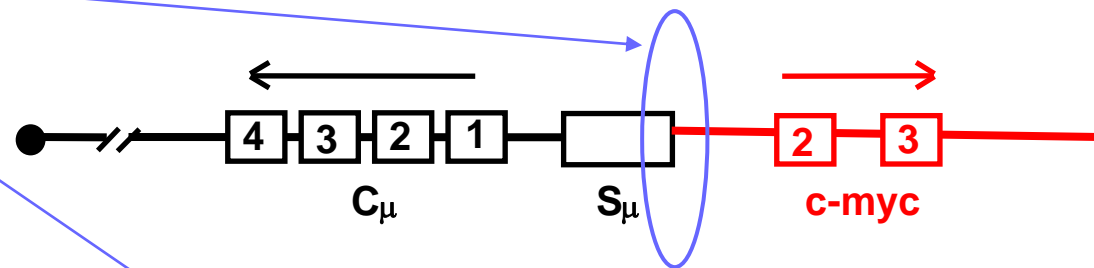

der 8

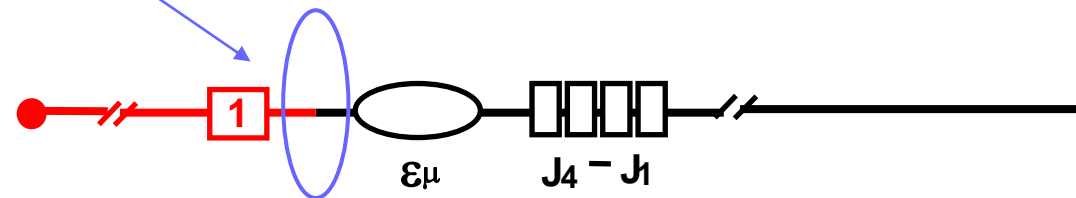



# CG and wGCw pack C's close together on anti-parallel strands

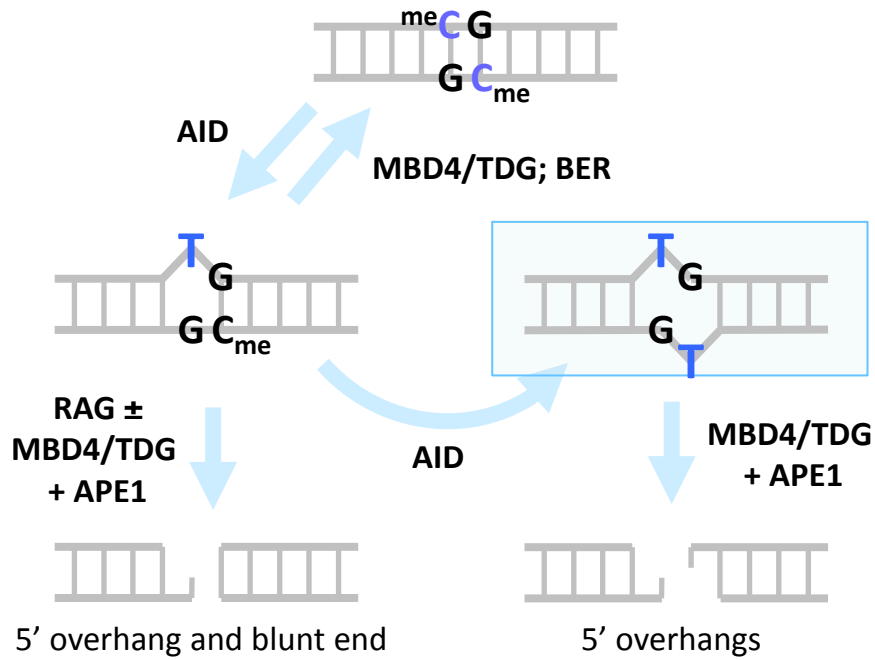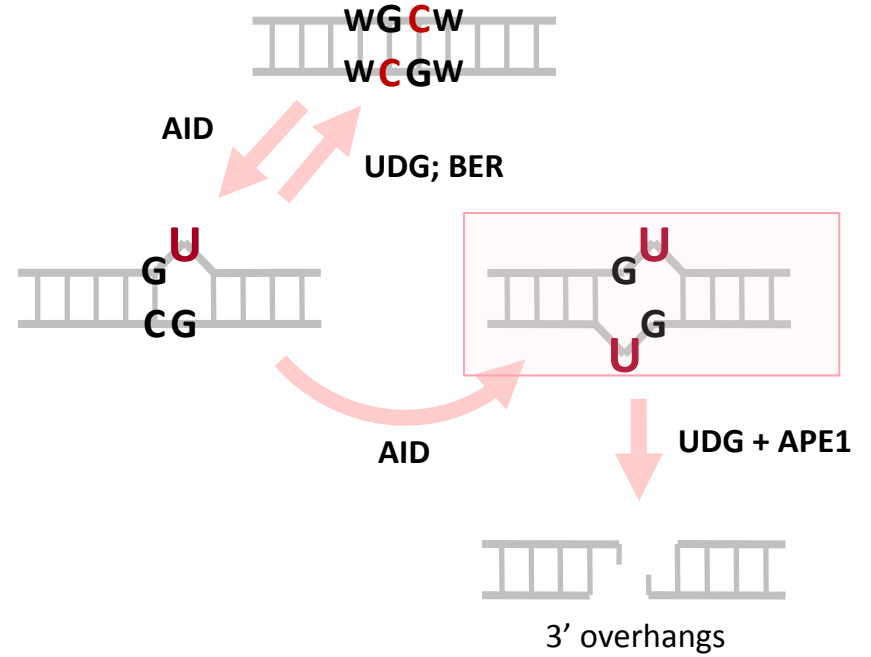

# Pathways by Which AID-Induced T:G Mismatches Lead to DSBs

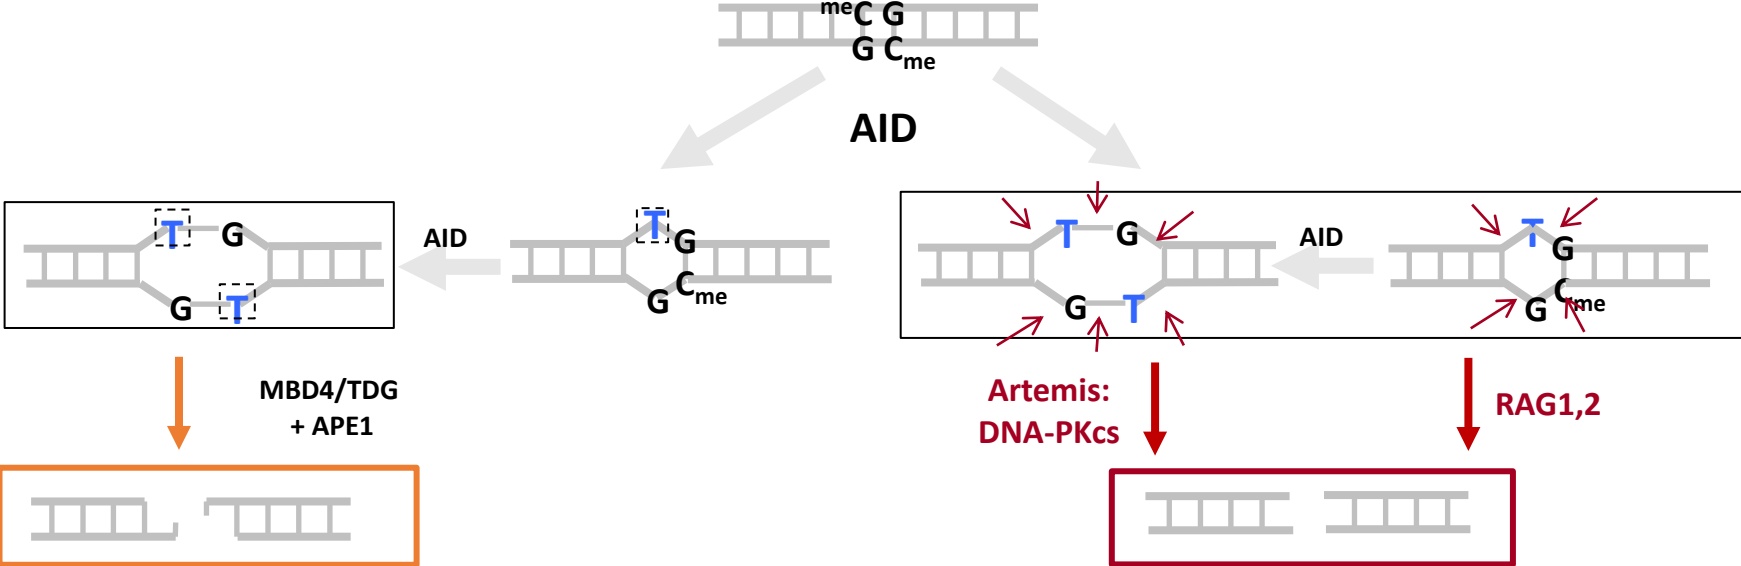

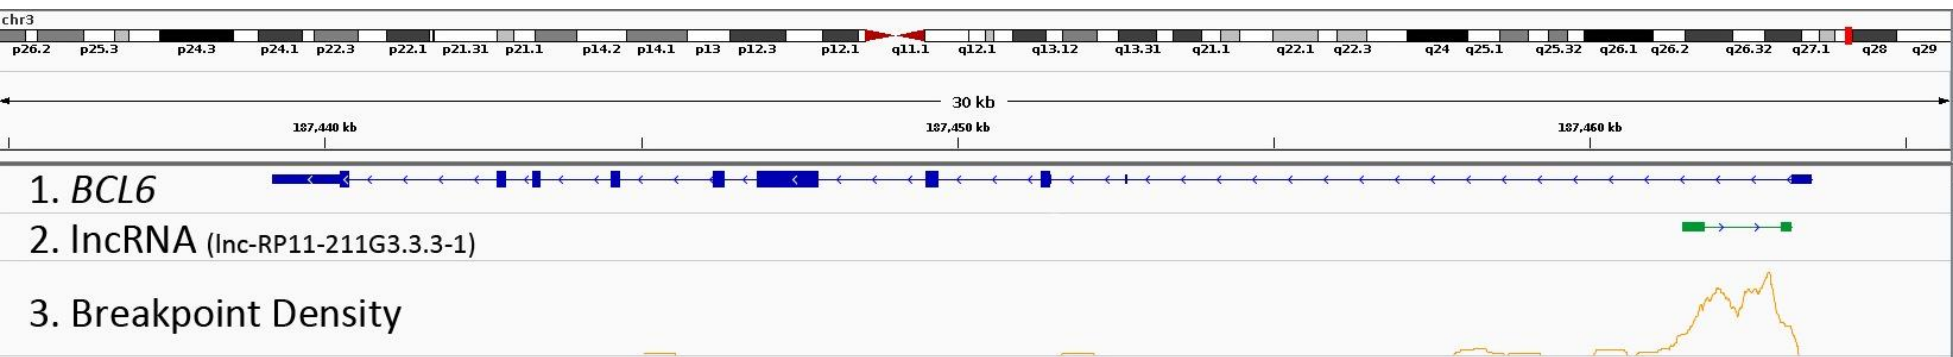

Suppl. Fig. 7
